# Supplementary material for: Phytochemical Composition of the Fruit of Large Cranberry (Vaccinium macrocarpon Aiton) Cultivars Grown in the Collection of the National Botanic Garden of Latvia
Source: MDPI journal article supplement (doi:10.3390/plants12040771), 2023-02-08
Supplement: s1 [file s1]

Supplementary material:

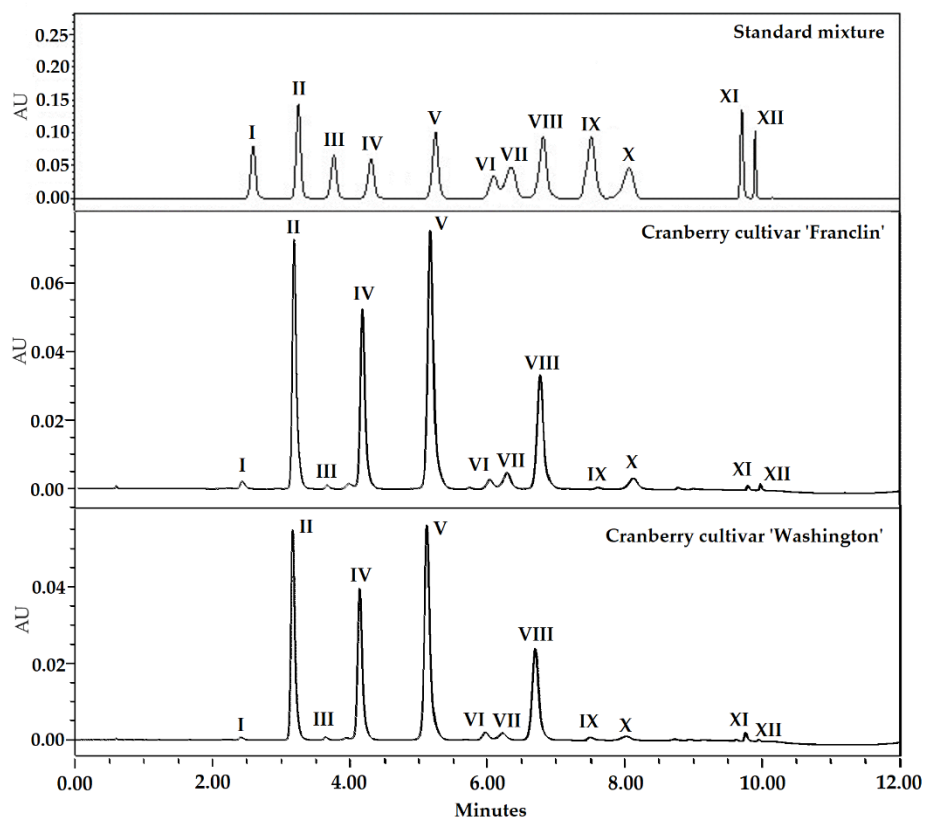

**Figure S1:** UHPLC-PDA chromatograms (λ = 520 nm) of the anthocyanin and anthocyanidin standards mixtures and large cranberry extracts of cultivars 'Franklin' and 'Washington'. The compounds of the identified peaks are described in Table S1.

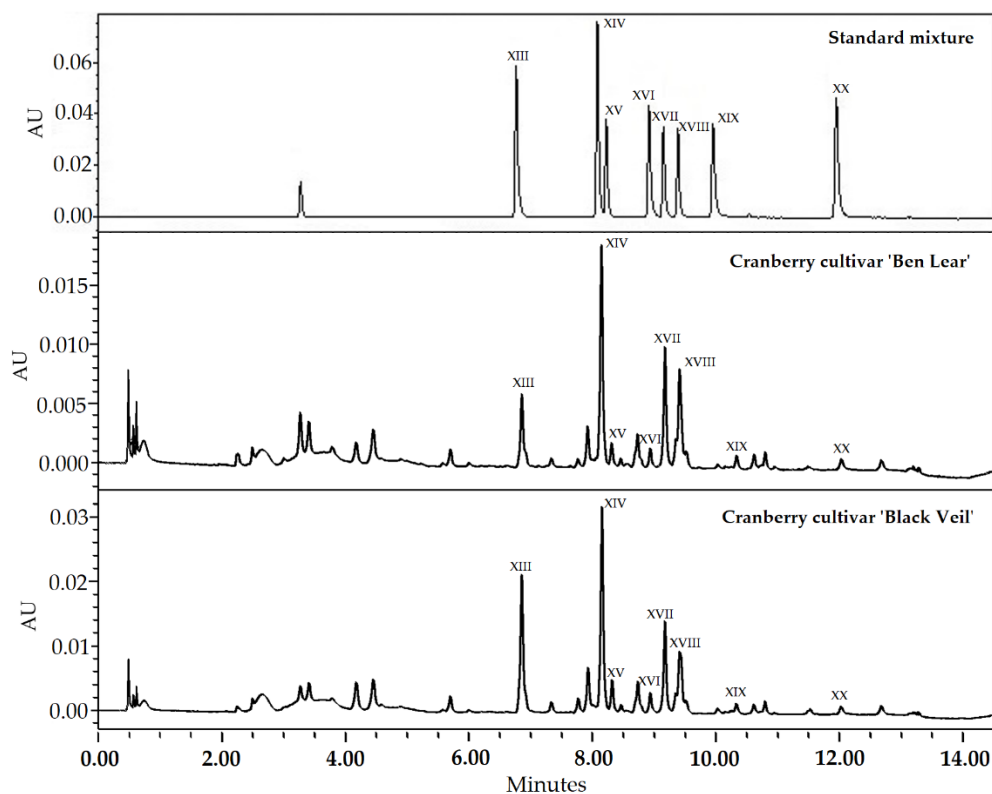

**Figure S2:** UHPLC-PDA chromatograms (λ = 360 nm) of flavonol standards mixture and the large cranberry extracts of cultivars 'Ben Lear' and 'Black Veil'. The compounds of the identified peaks are described in Table S1.

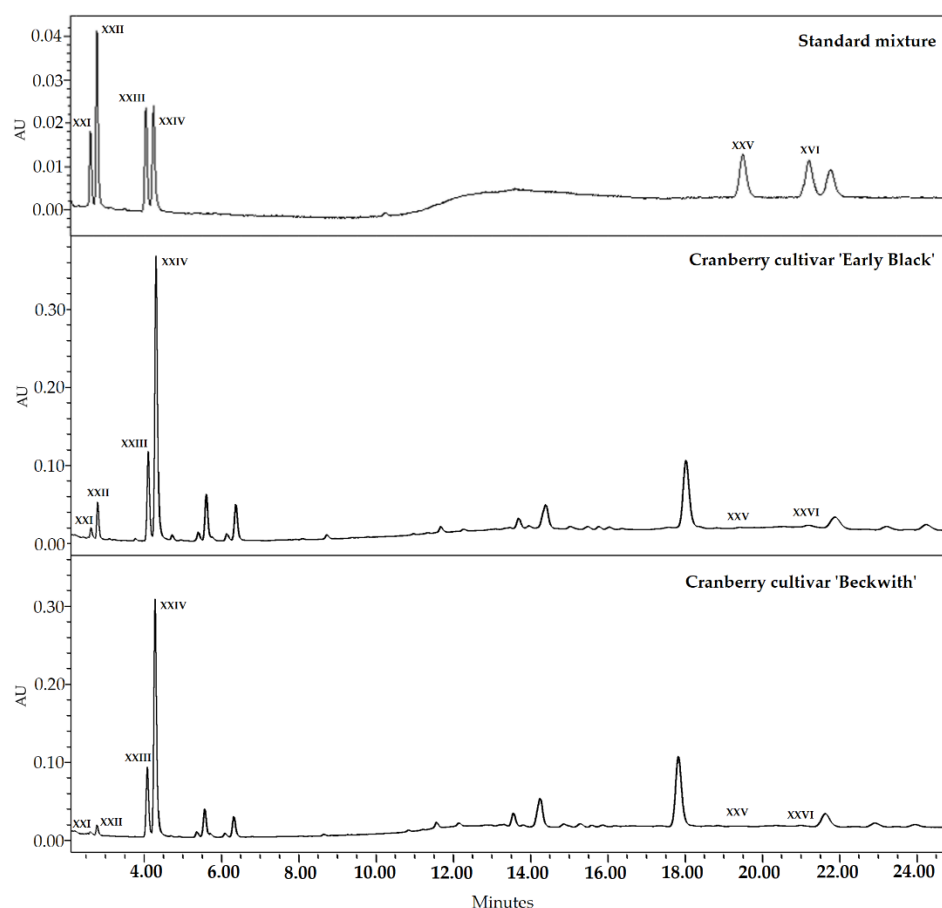

**Figure S3:** UHPLC-PDA chromatograms ( $\lambda = 205.5$  nm) of the triterpenoid standards mixture and the large cranberry extracts of cultivars 'Early Black' and 'Beckwith'. The compounds of the identified peaks are described in Table S1.

**Table S1.** Parameters of the identified compounds

| Peak  | Compound                                   | Linearity range ( $\mu\text{g/mL}$ ) | Calibration equation | $R^2$ | LOD  | LOQ  |
|-------|--------------------------------------------|--------------------------------------|----------------------|-------|------|------|
| I     | Delphinidin-3-galactoside                  | 3.91–125.00                          | $y = 4900x - 3480$   | 0.999 | 1.15 | 3.19 |
| II    | Cyanidin-3-galactoside                     | 0.78–125.00                          | $y = 4940x - 2370$   | 0.999 | 0.16 | 0.53 |
| III   | Cyanidin-3-glucoside                       | 3.13–100.00                          | $y = 4230x + 1610$   | 0.999 | 0.10 | 3.07 |
| IV    | Cyanidin-3-arabinoside                     | 3.13–100.00                          | $y = 4800x + 2220$   | 0.999 | 0.93 | 3.11 |
| V     | Peonidin-3-galactoside                     | 3.125–100                            | $y = 5320x + 8770$   | 0.999 | 0.35 | 2.53 |
| VI    | Peonidin-3-glucoside                       | 0.98–125.00                          | $y = 3970x - 1430$   | 0.999 | 0.30 | 0.99 |
| VII   | Malvidin-3-galactoside                     | 3.13–100.00                          | $y = 6890x + 3110$   | 0.999 | 1.00 | 3.09 |
| VIII  | Peonidin-3-arabinoside                     | 3.125–100                            | $y = 5940x + 5320$   | 0.999 | 0.42 | 1.36 |
| IX    | Cyanidin                                   | 0.78–100.00                          | $y = 10400x - 1930$  | 0.999 | 0.07 | 0.24 |
| X     | Malvidin-3-arabinoside                     | 0.78–125.00                          | $y = 5950x + 1590$   | 0.999 | 0.35 | 1.10 |
| XI    | Peonidin                                   | 1.56–100.00                          | $y = 7010x + 1020$   | 0.999 | 0.33 | 1.09 |
| XII   | Malvidin                                   | 3.13–100.00                          | $y = 1150x + 171$    | 0.999 | 0.59 | 1.96 |
| XIII  | Myricetin-3-galactoside                    | 0.78–100                             | $y = 3450x - 396$    | 0.999 | 0.18 | 0.54 |
| XIV   | Quercetin-3-galactoside                    | 3.13–200                             | $y = 4880x + 1180$   | 0.999 | 1.01 | 3.06 |
| XV    | Quercetin-3-glucoside                      | 3.13–50                              | $y = 4160x - 61,7$   | 0.999 | 0.92 | 2.78 |
| XVI   | Quercetin-3- $\alpha$ -L-arabinopyranoside | 3.13–50                              | $y = 5250x + 861$    | 0.999 | 0.70 | 2.12 |
| XVII  | Quercetin-3- $\alpha$ -L-arabinofuranoside | 3.13–50                              | $y = 4170x - 199$    | 0.999 | 0.99 | 3.03 |
| XVIII | Quercetin-3-rhamnoside                     | 3.13–50                              | $y = 3690x + 797$    | 0.999 | 0.76 | 2.29 |
| XIX   | Myricetin                                  | 1.56–50                              | $y = 5360x - 1240$   | 0.999 | 0.45 | 1.36 |
| XX    | Quercetin                                  | 3.13–50                              | $y = 7450x - 1070$   | 0.999 | 0.76 | 2.29 |
| XXI   | Maslinic acid                              | 3.125–200                            | $y = 2790x + 3990$   | 0.999 | 0.89 | 2.95 |
| XXII  | Corosolic acid                             | 3.125–200                            | $y = 3280x + 750$    | 0.999 | 0.66 | 2.21 |
| XXIII | Oleanolic acid                             | 2.344–600                            | $y = 3240x + 12900$  | 0.999 | 0.55 | 1.85 |
| XXIV  | Ursolic acid                               | 3.906–2000                           | $y = 2930x + 39000$  | 0.999 | 0.54 | 1.81 |
| XXV   | $\beta$ -Amyrin                            | 6.250–200                            | $y = 3170x + 6470$   | 0.999 | 1.11 | 3.69 |
| XXVI  | $\alpha$ -Amyrin                           | 6.250–200                            | $y = 3090x - 1030$   | 0.999 | 1.37 | 4.58 |
